# Supplementary material
Source: PubMed Central journal article supplement (PMC3816371)
Supplement: NIHMS517421-supplement-01.pdf [file NIHMS517421-supplement-01.pdf]

## Supplement Data

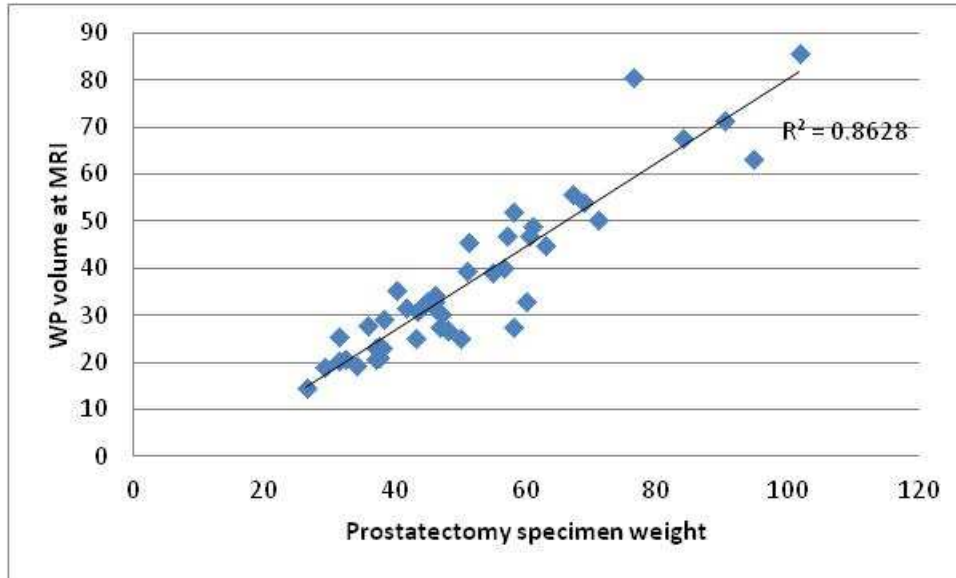

**Supplement data 1:** Linear regression analysis to validate accuracy of the MRI derived prostate volumes. MRI derived volumes of 47 patients (median age 60.6years, median serum PSA 5.15ng/dl), who underwent radical prostatectomy were compared with radical prostatectomy specimen weights. There was a strong positive correlation between MRI derived whole prostate volumes and specimen weights ( $R^2 = 0.863$ ).

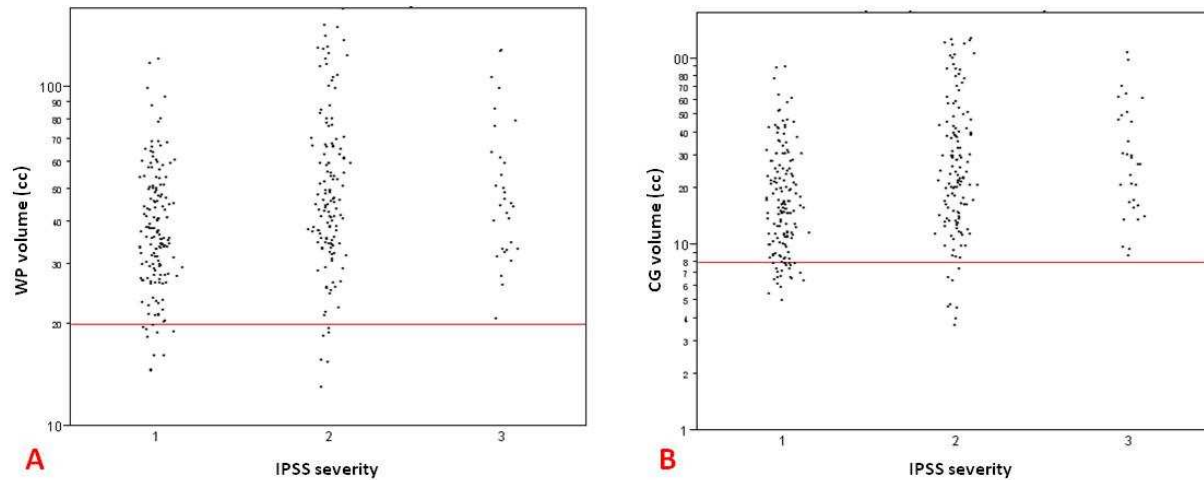

**Supplement data 2:** Whole prostate (A) and central gland (B) volumes vs. IPSS severity.

Although no threshold WP or CG volume could be assessed to predict severity of micturition symptoms, high IPSS scores indicating severe micturition symptoms were not encountered in patients with WP and CG volumes of <20cc and <8cc, respectively.
